# Supplementary material
Source: MDPI journal article supplement (https://www.mdpi.com/1424-8247/15/5/534)
Supplement: s1 [file s1]

# Cobalt Bis-Dicarbollide Enhances Antibiotics Action towards *Staphylococcus epidermidis* Planktonic Growth due to Cell Envelopes Disruption

Eva Vaňková <sup>1,\*</sup>, Kristýna Lokočová <sup>1</sup>, Petra Kašparová <sup>1</sup>, Romana Hadravová <sup>2</sup>, Ivana Křížová <sup>1</sup>, Olga Mařátková <sup>1</sup>, Jan Masák <sup>1</sup> and Václav Šícha <sup>3</sup>

<sup>1</sup> Department of Biotechnology, University of Chemistry and Technology Prague, Technická 5, 166 28 Prague, Czech Republic; kristynalokocova@gmail.com (K.L.); petra.kasparova@vscht.cz (P.K.); ivana.krizova@vscht.cz (I.K.); olga.matatkova@vscht.cz (O.M.); jan.masak@vscht.cz (J.M.)

<sup>2</sup> Institute of Organic Chemistry and Biochemistry of the Czech Academy of Sciences, Flemingovo náměstí 542/2, 166 10 Prague, Czech Republic; romana.hadravova@uochb.cas.cz

<sup>3</sup> Chemistry Department, Faculty of Science, Jan Evangelista Purkyně University in Ústí nad Labem, Pasteurova 15, 40096 Ústí nad Labem, Czech Republic; vaclav.sicha@ujep.cz

\* Correspondence: eva.vankova@vscht.cz

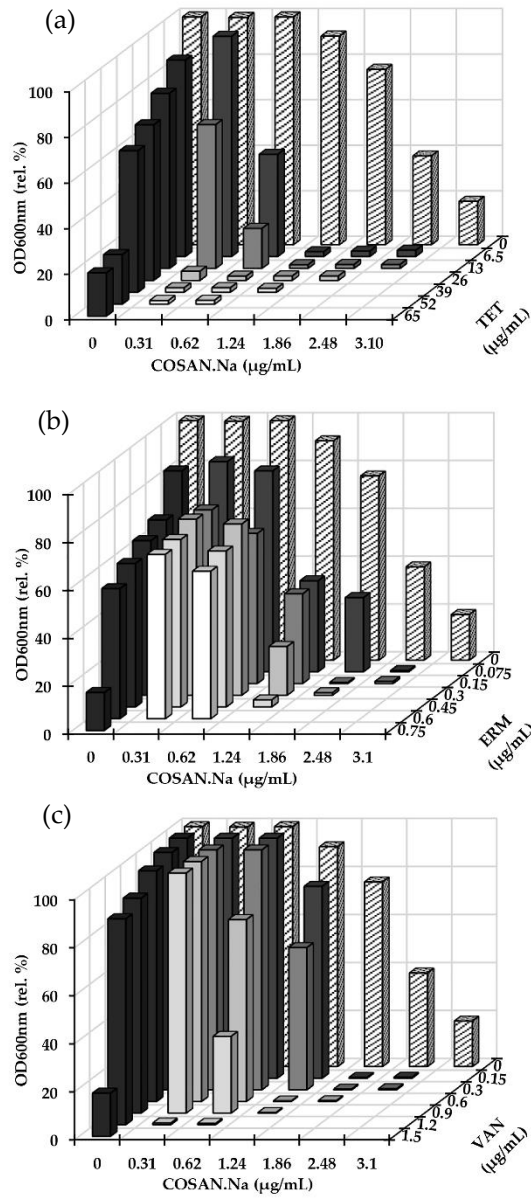

**Figure S1.** Inhibitory activity of tetracycline (TET), erythromycin (ERM), vancomycin (VAN) and sodium salt of cobalt bis-dicarbollide (COSAN.Na) alone or in their combination against *S. epidermidis* DBM 3179 planktonic growth. (a) TET + COSAN.Na; (b) ERM + COSAN.Na; (c) VAN + COSAN.Na. Results of optical density (OD) measured at 600 nm are given in relative percentages. Standard deviations ranged from ( $\pm$ ) 1 to 15 %.

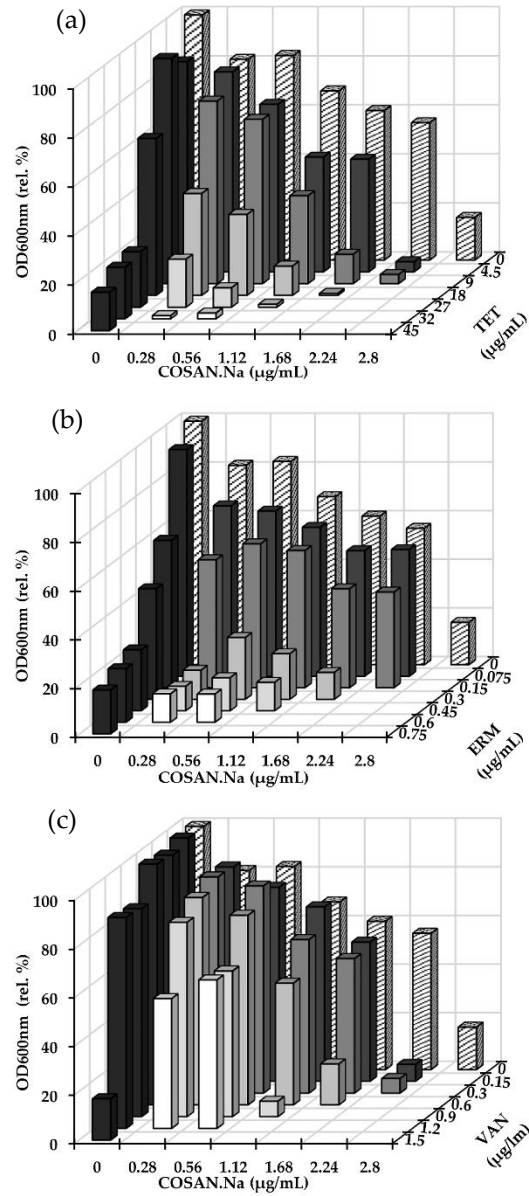

**Figure S2.** Inhibitory activity of tetracycline (TET), erythromycin (ERM), vancomycin (VAN) and sodium salt of cobalt bis-dicarbollide (COSAN.Na) alone or in their combination against *S. epidermidis* CNCTC 5671 planktonic growth. **(a)** TET + COSAN.Na; **(b)** ERM + COSAN.Na; **(c)** VAN + COSAN.Na. Results of optical density (OD) measured at 600 nm are given in relative percentages. Standard deviations ranged from ( $\pm$ ) 1 to 15 %.

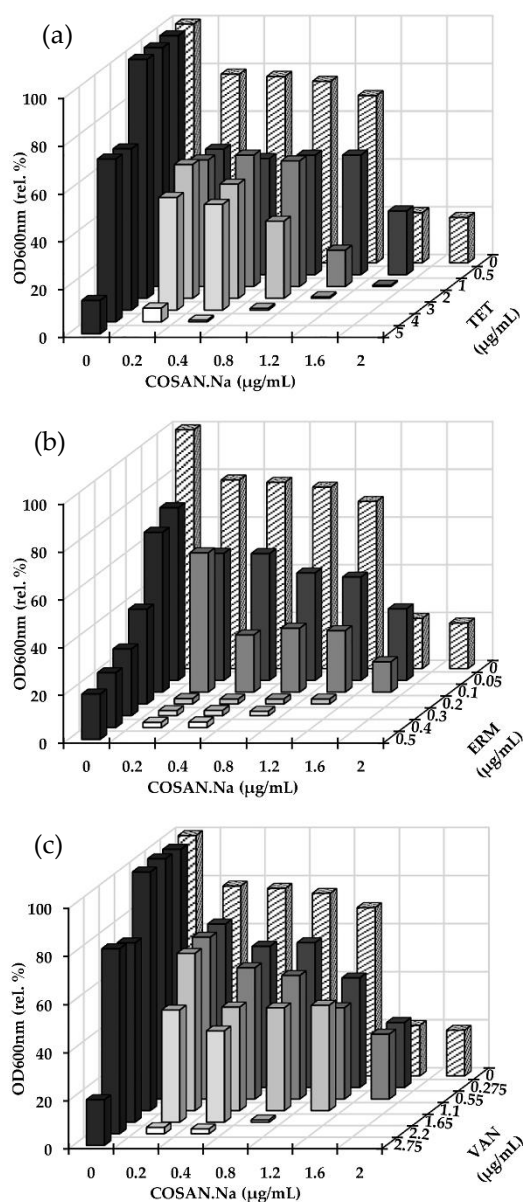

**Figure S3.** Inhibitory activity of tetracycline (TET), erythromycin (ERM), vancomycin (VAN) and sodium salt of cobalt bis-dicarbollide (COSAN.Na) alone or in their combination against *S. epidermidis* CCM 2343 planktonic growth. **(a)** TET + COSAN.Na; **(b)** ERM + COSAN.Na; **(c)** VAN + COSAN.Na. Results of optical density (OD) measured at 600 nm are given in relative percentages. Standard deviations ranged from ( $\pm$ ) 1 to 15 %.

**Table S1** Cytotoxicity of tetracycline (TET), erythromycin (ERM), vancomycin (VAN), sodium salt of cobalt bis-dicarbollide (COSAN.Na) and their combination against HEK 293T cells.

| HEK 293T viability (rel. %)       |                                   |                                  |                                                                 |                                                                 |                                                                  |
|-----------------------------------|-----------------------------------|----------------------------------|-----------------------------------------------------------------|-----------------------------------------------------------------|------------------------------------------------------------------|
| TET<br>4.5 $\mu\text{g/mL}$       | TET<br>45 $\mu\text{g/mL}$        | ERM<br>0.3 $\mu\text{g/mL}$      | ERM<br>0.75 $\mu\text{g/mL}$                                    | VAN<br>0.15 $\mu\text{g/mL}$                                    | VAN<br>2 $\mu\text{g/mL}$                                        |
| 98.63                             | 97.84                             | 96.39                            | 98.39                                                           | 99.81                                                           | 97.86                                                            |
| COSAN.Na<br>1.68 $\mu\text{g/mL}$ | COSAN.Na<br>2.24 $\mu\text{g/mL}$ | COSAN.Na<br>2.8 $\mu\text{g/mL}$ | TET 4.5 $\mu\text{g/mL}$<br>+ COSAN.Na<br>2.24 $\mu\text{g/mL}$ | ERM 0.3 $\mu\text{g/mL}$<br>+ COSAN.Na<br>1.68 $\mu\text{g/mL}$ | VAN 0.15 $\mu\text{g/mL}$<br>+ COSAN.Na<br>2.24 $\mu\text{g/mL}$ |
| 98.77                             | 98.00                             | 99.09                            | 95.58                                                           | 97.85                                                           | 97.26                                                            |
